# Supplementary material for: Effect of Inappropriate Treatment in Hospitalized Patients with Pyelonephritis Treated with Cefuroxime: A Cohort Study
Source: MDPI journal article supplement (doi:10.3390/antibiotics13030274), 2024-03-19
Supplement: s1 [file s1]

Supplementary material to Jorge Alberto Cortés <sup>1\*</sup>, Ricardo Sánchez <sup>2</sup> and Claudia Rocío Sierra <sup>3</sup>,  
**Effect of Inappropriate Treatment in Hospitalized Patients with Pyelonephritis treated with Cefuroxime in a Cohort Study**

**Table S1.** Susceptibility results from *E. coli* isolates from community acquired pyelonephritis.

| Antibiotic           | Number tested | Susceptibility (%) |
|----------------------|---------------|--------------------|
| Ampicillin           | 727           | 41.1               |
| Ampicillin-sulbactam | 747           | 49.1               |
| Cefazolin            | 726           | 55.8               |
| Cefuroxime           | 747           | 86.3               |
| Ceftriaxone          | 746           | 89.8               |
| Cefotaxime           | 726           | 90.1               |
| Ceftazidime          | 747           | 94.8               |
| Cefepime             | 746           | 97.0               |
| Ertapenem            | 745           | 100.0              |
| Meropenem            | 747           | 100.0              |
| Ciprofloxacin        | 746           | 70.2               |
| Amikacin             | 747           | 98.8               |
| Gentamicin           | 744           | 84.7               |

**Table S2.** Parametric model (Weibull) for the association between inappropriate therapy and length of stay using a matched propensity score.

| Variable                      | HR   | IC95%       |
|-------------------------------|------|-------------|
| Inappropriate therapy         | 0.26 | 0.12 – 0.54 |
| Oral treatment at discharge   | 0.14 | 0.08 – 0.24 |
| One or more comorbidities     | 2.22 | 1.58 – 3.13 |
| More than 60 years-old        | 1.36 | 0.95 – 1.97 |
| Antibiotic change during stay | 3.28 | 1.48 – 7.29 |
| ICU admission                 | 6.59 | 3.2 – 13.6  |

Data from 320 patients, matched 3:1 (105 patients with exposure).

**Table S3.** Association between inappropriate therapy and length of stay using a Poisson model.

| Variable                      | aIRR* | IC95%       |
|-------------------------------|-------|-------------|
| Inappropriate therapy         | 0.56  | 0.46 – 0.70 |
| Oral treatment at discharge   | 0.61  | 0.54 – 0.69 |
| One or more comorbidities     | 1.13  | 1.04 – 1.21 |
| More than 60 years-old        | 1.15  | 1.07 – 1.23 |
| Antibiotic change during stay | 1.54  | 1.28 – 1.86 |
| ICU admission                 | 1.40  | 1.21 – 1.62 |

\*aIRR: adjusted incidence rate ratio
